# Supplementary material for: Low Adherence to Mediterranean Diet Characterizes Metabolic Patients with Gastrointestinal Cancer
Source: MDPI journal article supplement (doi:10.3390/nu16050630), 2024-02-24
Supplement: s1 [file s1]

**Supplementary Table S1.** Comparison between patients according to GI cancer diagnosis and Chrono Med Diet Score/ ROC identified cut-off. Comparison was performed with Student T-Test analysis. Data are presented as mean  $\pm$  SD (Standard Deviation). Abbreviations: Body Mass Index, BMI; Waist Circumference, WC; Total Cholesterol, TC; High-Density Lipoprotein Cholesterol, HDL-c; Low-Density Lipoprotein Cholesterol, LDL-c; Triglycerides, TG; Fasting Plasma Glucose, FPG.

| Clinical Variable        | NO Cancer                     | GI Cancer                | p-value |
|--------------------------|-------------------------------|--------------------------|---------|
|                          | CMD5 >12<br>N= 201 (90M:111F) | CMD5 >12<br>N= 9 (7M:2F) |         |
| Age (Years)              | 60.1 $\pm$ 5.3                | 59.8 $\pm$ 6.0           | 0.5564  |
| BMI (Kg/m <sup>2</sup> ) | 29.9 $\pm$ 3.9                | 29.3 $\pm$ 4.4           | 0.7839  |
| WC (cm)                  | 93.9 $\pm$ 5.6                | 97.0 $\pm$ 9.3           | 0.3382  |
| TC (mg/dl)               | 177.5 $\pm$ 6.0               | 183.2 $\pm$ 17.4         | 0.3891  |
| HDL-c (mg/dl)            | 52.0 $\pm$ 5.7                | 47.4 $\pm$ 8.4           | 0.1091  |
| LDL-c (mg/dl)            | 97.4 $\pm$ 7.3                | 100.5 $\pm$ 18.3         | 0.6621  |
| TG (mg/dl)               | 110.3 $\pm$ 6.4               | 118.4 $\pm$ 21.4         | 0.1182  |
| FPG (mg/dl)              | 92.5 $\pm$ 7.8                | 100.3 $\pm$ 9.9          | 0.0929  |

**Supplementary Table S2.** Comparison between patients according to GI cancer diagnosis and Chrono Med Diet Score/ ROC identified cut-off. Comparison was performed with Student T-Test analysis. Data are presented as mean  $\pm$  SD (Standard Deviation). (\* $p$ <0.05; \*\*  $p$ <0.01). Abbreviations: Body Mass Index, BMI; Waist Circumference, WC; Total Cholesterol, TC; High-Density Lipoprotein Cholesterol, HDL-c; Low-Density Lipoprotein Cholesterol, LDL-c; Triglycerides, TG; Fasting Plasma Glucose, FPG.

| Clinical Variable        | No Cancer                          | GI Cancer                         | p-value  |
|--------------------------|------------------------------------|-----------------------------------|----------|
|                          | CMD5 $\leq$ 12<br>N= 129 (70M:59F) | CMD5 $\leq$ 12<br>N= 31 (20M:11F) |          |
| Age (Years)              | 60.7 $\pm$ 5.7                     | 60.5 $\pm$ 5.9                    | 0.4112   |
| BMI (Kg/m <sup>2</sup> ) | 30.1 $\pm$ 3.7                     | 30.8 $\pm$ 4.0                    | 0.7663   |
| WC (cm)                  | 99.5 $\pm$ 5.3                     | 106.2 $\pm$ 6.6                   | 0.0288*  |
| TC (mg/dl)               | 179.3 $\pm$ 8.6                    | 185.2 $\pm$ 13.5                  | 0.2843   |
| HDL-c (mg/dl)            | 49.1 $\pm$ 5.1                     | 41.3 $\pm$ 7.4                    | 0.0083** |
| LDL-c (mg/dl)            | 102.8 $\pm$ 11.4                   | 106.2 $\pm$ 11.5                  | 0.2771   |
| TG (mg/dl)               | 111.3 $\pm$ 9.9                    | 131.5 $\pm$ 17.1                  | 0.0099** |
| FPG (mg/dl)              | 100.3 $\pm$ 5.8                    | 110.4 $\pm$ 8.6                   | 0.0812   |
